# Supplementary material
Source: MDPI journal article supplement (https://www.mdpi.com/2073-4344/13/2/273)
Supplement: s1 [file s1]

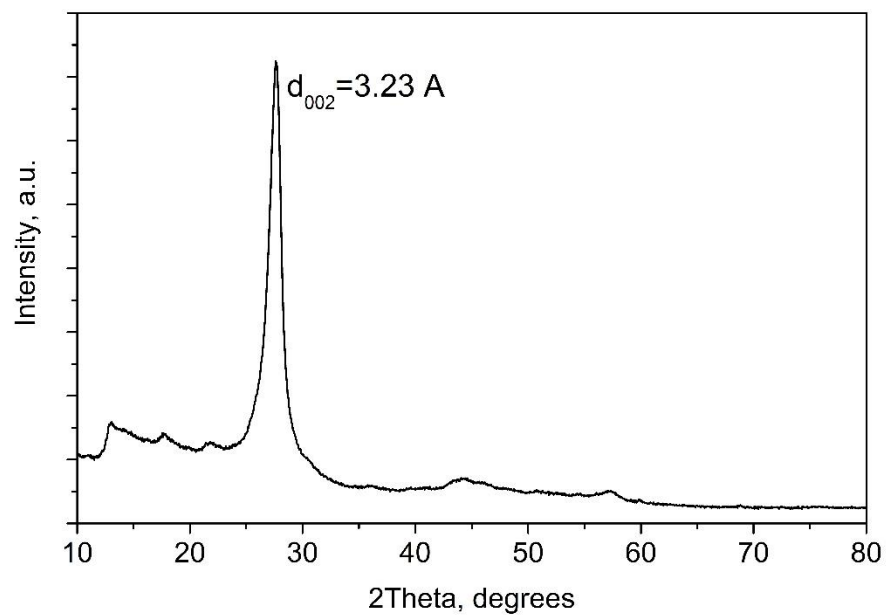

**Figure S1.** XRD pattern of the g-C<sub>3</sub>N<sub>4</sub> 600.

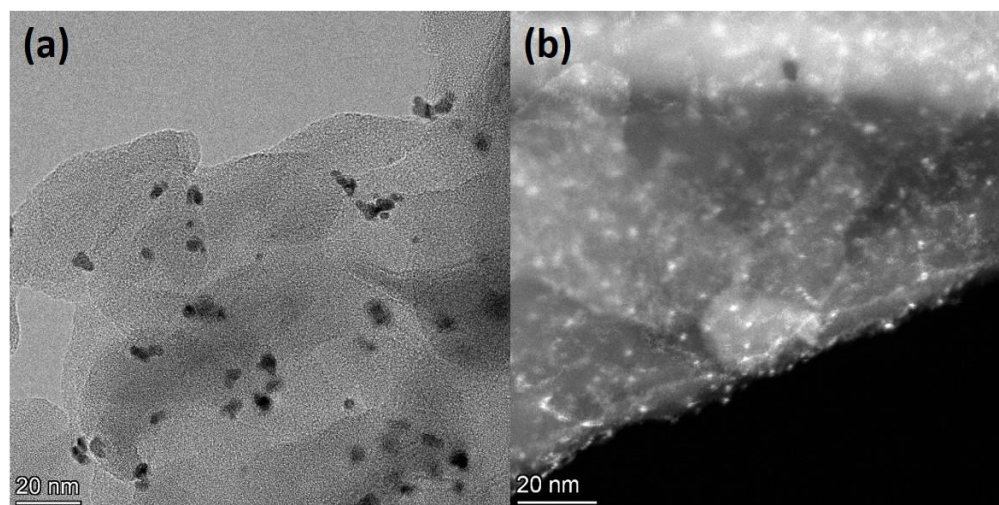

**Figure S2.** HR TEM image of 1% Pt(CD)/g-C<sub>3</sub>N<sub>4</sub> 600 (a) and HAADF STEM image of 1% Pt(PD)/g-C<sub>3</sub>N<sub>4</sub> 600 (b).
